# Supplementary material
Source: publisher figshare collection journal article supplement (https://sage.figshare.com/ndownloader/files/30771781)
Supplement: Supplementary file 1 [file 30771781]

**Examining Associations between Major Negative Life Events, Changes in Weekly Reports of Posttraumatic Growth and Global Reports of Eudaimonic Well-Being**

**Supplementary Tables**

**Supplementary Table 1**

Differences between participants with PTG data at each time point vs. participants with missing PTG data

|  |  | Complete | | Missing | |  |  |
| --- | --- | --- | --- | --- | --- | --- | --- |
|  |  | *M* | *SD* | *M* | *SD* | *t or* χ*²* | *p* |
| Female | | 46% | | 52% | | 2.625 | 0.105 |
| Age | | 49.38 | 14.47 | 45.41 | 14.78 | 3.741 | <.001 |
| Household Income | | $58,021.03 | $37,106.20 | $56,394.49 | $41,691.38 | 0.552 | 0.581 |
| Urban (vs. Rural) | | 61% | | 64% | | 0.369 | 0.544 |
| Education | |  |  |  |  | 15.827 | 0.007 |
|  | No Degree | 2.6% | | 0.8% | | - | - |
|  | High School Degree | 15.9% | | 20.2% | | - | - |
|  | Some College | 26.4% | | 17.2% | | - | - |
|  | Associates Degree | 11.7% | | 11.8% | | - | - |
|  | Bachelor's Degree | 28.4% | | 36.6% | | - | - |
|  | Graduate Degree | 15.1% | | 13.4% | | - | - |
| Ethnicity | |  |  |  |  | 3.353 | 0.340 |
|  | White | 82.7% | | 87.0% | | - | - |
|  | Black | 9.5% | | 7.6% | | - | - |
|  | Asian | 4.4% | | 3.8% | | - | - |
|  | Other | 3.4% | | 1.7% | | - | - |
| EWB T0 | | 3.70 | 0.78 | 3.59 | 0.84 | 1.885 | 0.060 |
| PTG T1 | | 3.48 | 0.69 | 3.41 | 0.74 | 1.275 | 0.203 |
| PTG1 T1 | | 3.67 | 0.86 | 3.59 | 0.93 | 1.253 | 0.210 |
| PTG2 T1 | | 3.26 | 1.26 | 3.22 | 1.25 | 0.417 | 0.677 |
| PTG3 T1 | | 3.74 | 0.96 | 3.58 | 1.03 | 2.210 | 0.027 |
| PTG4 T1 | | 3.95 | 0.89 | 3.83 | 0.99 | 1.673 | 0.095 |
| PTG5 T1 | | 2.76 | 1.03 | 2.82 | 1.07 | 0.816 | 0.415 |

*Note*. Chi-square tests were used for categorical variables, and *t*-tests were used for continuous variables.

**Supplementary Table 2**

Illustration of the long data structure and discontinuity predictor variables

| ID | Week | NLEs | 1st NLE | 1st NLE ΔSlope | Cumulative NLE | Cumulative NLE ΔSlope | PTG |
| --- | --- | --- | --- | --- | --- | --- | --- |
| 1 | 1 | 0 | 0 | 0 | 0 | 0 | DV1.1 |
| 1 | 2 | 0 | 0 | 0 | 0 | 0 | DV1.2 |
| 1 | 3 | 0 | 0 | 0 | 0 | 0 | DV1.3 |
| 1 | 4 | 0 | 0 | 0 | 0 | 0 | DV1.4 |
| 1 | 5 | 0 | 0 | 0 | 0 | 0 | DV1.5 |
| 1 | 6 | 0 | 0 | 0 | 0 | 0 | DV1.6 |
| 1 | 7 | 0 | 0 | 0 | 0 | 0 | DV1.7 |
| 2 | 1 | 1 | 1 | 1 | 1 | 1 | DV2.1 |
| 2 | 2 | 0 | 1 | 2 | 1 | 2 | DV2.2 |
| 2 | 3 | 0 | 1 | 3 | 1 | 3 | DV2.3 |
| 2 | 4 | 0 | 1 | 4 | 1 | 4 | DV2.4 |
| 2 | 5 | 0 | 1 | 5 | 1 | 5 | DV2.5 |
| 2 | 6 | 0 | 1 | 6 | 1 | 6 | DV2.6 |
| 2 | 7 | 0 | 1 | 7 | 1 | 7 | DV2.7 |
| 3 | 1 | 0 | 0 | 0 | 0 | 0 | DV3.1 |
| 3 | 2 | 0 | 0 | 0 | 0 | 0 | DV3.2 |
| 3 | 3 | 0 | 0 | 0 | 0 | 0 | DV3.3 |
| 3 | 4 | 1 | 1 | 1 | 1 | 1 | DV3.4 |
| 3 | 5 | 0 | 1 | 2 | 1 | 2 | DV3.5 |
| 3 | 6 | 0 | 1 | 3 | 1 | 3 | DV3.6 |
| 3 | 7 | 0 | 1 | 4 | 1 | 4 | DV3.7 |
| 4 | 1 | 0 | 0 | 0 | 0 | 0 | DV4.1 |
| 4 | 2 | 1 | 1 | 1 | 1 | 1 | DV4.2 |
| 4 | 3 | 0 | 1 | 2 | 1 | 2 | DV4.3 |
| 4 | 4 | 0 | 1 | 3 | 1 | 3 | DV4.4 |
| 4 | 5 | 1 | 1 | 4 | 2 | 5 | DV4.5 |
| 4 | 6 | 0 | 1 | 5 | 2 | 7 | DV4.6 |
| 4 | 7 | 0 | 1 | 6 | 2 | 9 | DV4.7 |
| … | … | … | … | … | … | … | … |

*Note*. NLE = Negative Life Event. PTG = Posttraumatic Growth.

**Supplementary Table 3**

*Means and Standard Deviations for Weekly PTG and Sample Size at Each Assessment as well as Intercept and Slope from a Linear Growth Curve Model.*

|  | *M* | *SD* | *n* |
| --- | --- | --- | --- |
| PTG1 | 3.43 | 0.73 | 1036 |
| PTG2 | 3.42 | 0.74 | 1005 |
| PTG3 | 3.38 | 0.75 | 734 |
| PTG4 | 3.39 | 0.73 | 948 |
| PTG5 | 3.34 | 0.73 | 956 |
| PTG6 | 3.36 | 0.72 | 919 |
| PTG7 | 3.36 | 0.70 | 911 |
| PTG8 | 3.36 | 0.72 | 862 |
| PTG9 | 3.34 | 0.74 | 877 |
| PTG10 | 3.33 | 0.72 | 857 |
| PTG11 | 3.32 | 0.73 | 844 |
| PTG12 | 3.32 | 0.72 | 845 |
| PTG13 | 3.33 | 0.74 | 821 |
| PTG14 | 3.31 | 0.74 | 844 |
| PTG15 | 3.32 | 0.75 | 843 |
| PTG17 | 3.33 | 0.73 | 806 |
| PTG18 | 3.34 | 0.75 | 804 |
| PTG19 | 3.32 | 0.75 | 792 |
| PTG20 | 3.33 | 0.74 | 791 |
| PTG22 | 3.34 | 0.73 | 768 |
| PTG23 | 3.34 | 0.74 | 773 |
| PTG24 | 3.35 | 0.73 | 772 |
| PTG25 | 3.34 | 0.75 | 768 |
| PTG26 | 3.36 | 0.73 | 756 |
| PTG27 | 3.34 | 0.73 | 757 |
| PTG28 | 3.37 | 0.73 | 740 |
| PTG29 | 3.36 | 0.73 | 736 |
| PTG31 | 3.38 | 0.72 | 727 |
| PTG32 | 3.36 | 0.73 | 726 |
| PTG33 | 3.36 | 0.73 | 713 |
| PTG34 | 3.36 | 0.75 | 714 |
| PTG35 | 3.35 | 0.74 | 700 |
| PTG36 | 3.37 | 0.73 | 699 |
| PTG37 | 3.34 | 0.77 | 699 |
| PTG38 | 3.38 | 0.74 | 703 |
| PTG39 | 3.36 | 0.77 | 692 |
| PTG40 | 3.44 | 0.73 | 691 |
| PTG42 | 3.37 | 0.75 | 684 |
| PTG43 | 3.39 | 0.74 | 676 |
| PTG44 | 3.39 | 0.77 | 668 |
| PTG48 | 3.31 | 0.78 | 628 |
| PTG49 | 3.39 | 0.77 | 642 |
| PTG50 | 3.35 | 0.75 | 639 |
| PTG51 | 3.36 | 0.75 | 637 |
| PTG Intercept (T0) | 3.36 | 0.58 | 1149 |
| PTG Slope | 0.00 | 0.00 | 1149 |

**Supplementary Table 4**

*EWB Means, Standard Deviations, and Sample Size at Each Time Point as well as Intercept and Slope from a Linear Growth Curve Model.*

|  | *M* | *SD* | *n* |
| --- | --- | --- | --- |
| EWB T0 | 3.61 | 0.83 | 1247 |
| EWB T45 | 3.62 | 0.82 | 644 |
| EWB T52 | 3.61 | 0.79 | 592 |
| EWB Intercept (T0) | 3.61 | 0.77 | 1247 |
| EWB Slope | 0.00 | 0.01 | 1247 |

**Supplementary Table 5**

Fit Statistics from Models Testing the Indirect Effect of Negative Life Events on Changes in

Eudaimonic Well-Being Through Changes in PTG

| Model | χ² | *df* | *p* | CFI | RMSEA | RMSEA 90% CI | SRMR |
| --- | --- | --- | --- | --- | --- | --- | --- |
| PTG Scale | 2517.283 | 1288 | <.001 | 0.950 | 0.028 | 0.026-0.029 | 0.056 |
| PTG Item 1 | 2439.229 | 1288 | <.001 | 0.930 | 0.027 | 0.025-0.028 | 0.065 |
| PTG Item 2 | 2346.462 | 1288 | <.001 | 0.962 | 0.026 | 0.024-0.027 | 0.037 |
| PTG Item 3 | 2195.139 | 1288 | <.001 | 0.945 | 0.024 | 0.022-0.025 | 0.057 |
| PTG Item 4 | 2137.891 | 1288 | <.001 | 0.950 | 0.023 | 0.021-0.025 | 0.058 |
| PTG Item 5 | 2192.544 | 1288 | <.001 | 0.951 | 0.024 | 0.022-0.025 | 0.053 |

*Note*. PTG = Posttraumatic Growth.

**Supplementary Table 6**

Fit Statistics from Models Testing the Indirect Effect of Subjective Ratings of Life Events on Changes in EWB Through Changes in PTG

| Model | χ² | *df* | *p* | CFI | RMSEA | RMSEA 90% CI | SRMR |
| --- | --- | --- | --- | --- | --- | --- | --- |
| PTG Scale | 2522.618 | 1288 | <.001 | 0.949 | 0.028 | 0.026-0.029 | 0.057 |
| PTG Item 1 | 2398.026 | 1288 | <.001 | 0.932 | 0.026 | 0.025-0.028 | 0.064 |
| PTG Item 2 | 2366.311 | 1288 | <.001 | 0.961 | 0.026 | 0.024-0.028 | 0.037 |
| PTG Item 3 | 2151.784 | 1288 | <.001 | 0.948 | 0.023 | 0.021-0.025 | 0.057 |
| PTG Item 4 | 2126.962 | 1288 | <.001 | 0.951 | 0.023 | 0.021-0.025 | 0.058 |
| PTG Item 5 | 2157.907 | 1288 | <.001 | 0.953 | 0.023 | 0.022-0.025 | 0.053 |
